# Supplementary material for: HCC in the Era of Direct-Acting Antiviral Agents (DAAs): Surgical and Other Curative or Palliative Strategies in the Elderly
Source: MDPI journal article supplement (doi:10.3390/cancers13123025), 2021-06-17
Supplement: s1 [file s1]

**Table S1.** Characteristics of the study population—younger than 65 years.

| Variable                                      | HCC-O<br>( <i>n</i> = 3) | Without HCC ( <i>n</i> = 53) | Total<br>( <i>n</i> = 56) | P value |
|-----------------------------------------------|--------------------------|------------------------------|---------------------------|---------|
| Age,y, median [IQR]                           | 54 [52,5-55,5]           | 54 [51-57]                   | 54 [51-57]                | 0,913   |
| Male, <i>n</i> (%)                            | 3 (100)                  | 39 (73,58)                   | 42 (75)                   | 0,565   |
| Female, <i>n</i> (%)                          | 0 (0)                    | 14 (26,42)                   | 14 (25)                   |         |
| Comorbidities <i>n</i> (%)                    |                          |                              |                           |         |
| Cardiovascular diseases                       | 0 (0)                    | 1 (1,89)                     | 1 (1,79)                  | 1       |
| Kidney failure                                | 0 (0)                    | 2 (3,77)                     | 2 (3,57)                  | 1       |
| Hypertension                                  | 0 (0)                    | 3 (5,66)                     | 3 (5,36)                  | 1       |
| Hemoglobin disorders                          | 1 (33,33)                | 1 (1,89)                     | 2 (3,57)                  | 0,105   |
| ASA                                           |                          |                              |                           | 0,0188  |
| I                                             | 1 (33,33)                | 50 (94,34)                   | 51 (91,07)                | 1       |
| II                                            | 2 (66,67)                | 3 (5,66)                     | 5 (8,93)                  |         |
| III                                           | 0 (0)                    | 0 (0)                        | 0 (0)                     |         |
| HCV Genotype, <i>n</i> (%)                    |                          |                              |                           | 1       |
| 1                                             | 2 (66,67)                | 32 (60,38)                   | 34 (60,71)                | 1       |
| Non-1                                         | 1 (33,33)                | 21 (39,62)                   | 22 (39,29)                |         |
| Child-Turcotte- Pugh score, <i>n</i> (%)      |                          |                              |                           |         |
| A                                             | 3 (100)                  | 45 (84,91)                   | 48 (85,71)                | 1       |
| B                                             | 0 (0)                    | 7 (13,21)                    | 7 (12,50)                 |         |
| C                                             | 0 (0)                    | 1 (1,89)                     | 1 (1,79)                  |         |
| MELD, median [IQR]                            | 13 [10-15,50]            | 8 [7-10]                     | 8 [7-11]                  | 0,232   |
| METAVIR, <i>n</i> (%)                         |                          |                              |                           |         |
| F0-1                                          | 0 (0)                    | 10 (18,87)                   | 10 (17,86)                | 0,272   |
| F2                                            | 1 (33,33)                | 8 (15,09)                    | 9 (16,07)                 |         |
| F3                                            | 1 (33,33)                | 6 (11,32)                    | 7 (12,50)                 |         |
| F4                                            | 1 (33,33)                | 29 (54,72)                   | 30 (53,57)                |         |
| FIB-4, median [IQR]                           | 6,44 [3,71-6,49]         | 3,34 [1,82-5,1]              | 3,54 [1,78-5,54]          | 0,757   |
| Stiffness, median [IQR]                       | 11,70 [9,8-13,35]        | 14,6 [8,8-17,3]              | 14,6 [8,58-17,15]         | 0,649   |
| Steatosis                                     | 0 (0)                    | 3 (5,66)                     | 3 (5,36)                  | 1       |
| Platelets, 10 <sup>9</sup> /l, median [Range] | 58 [26-170]              | 129 [60-300]                 | 126 [26-300]              | 0,020   |
| AFP pre-DAA, UI/l, median [IQR]               | 34,80 [18,5-43,05]       | 1,39 [0,66-3,11]             | 1,45 [0,69-3,25]          | 0,033   |
| DAA, <i>n</i> (%)                             |                          |                              |                           | 1       |
| SOF Based                                     | 3 (100)                  | 45 (84.91)                   | 48 (85.71)                | 1       |
| No SOF Based                                  | 0 (0)                    | 8 (10.09)                    | 8 (14.29)                 |         |
